# Supplementary material for: Determination of the nitrogen abundance in organic materials by NanoSIMS quantitative imaging
Source: Royal Society of Chemistry journal article supplement (doi:10.1039/c3ja50313e), 2013-12-02
Supplement: c3ja50313e.pdf [file c3ja50313e.pdf]

# Calibration and reverse calibration : R functions and examples

Aurélien THOMEN, Laurent REMUSAT, François ROBERT

06/18/2013

This supplementary information file provides recipe to perform an univariate calibration with a linear model, to calculate the prediction (and confidence) interval of the dependent variables, to reverse the calibration and the interval for a new measurement, to calculate the critical limit and its associated value in x axis. The code is written in R programming language [1]. R is free and open-source, dedicated to data mining and statistics and multi-platform (Windows, Mac OS X, Linux). It was found to be the most suitable way to share the calibration methods used in this paper. The data are shown in the Table 1.

## 1 R function

This section provides the functions to perform the calculation. The linear regression, prediction and confidence interval and linear model and interval inversion formula can be found in the book of [2, 3] the critical limit calculation can be found in [3].

```
# return a data.frame of the linear model of calibration and prediction interval
# for content sequence
# x          : values of the standards
# y          : values of the measurements of the standards
# content    : unique values of the standards,
#             by default content = seq(range(x),len=length(x))
# alpha     : interval with a (1-alpha)100 level;
#             by default alpha = 0.05 for 95% confidence level
# m         : m = 1 by default to produce prediction interval
#             with a (1-alpha)100 level
#             m = Inf to produce confidence interval

interv <- function( x, y,alpha , content=seq(min(x),max(x),len=2*length(unique(x))), m=1){
  #linear model
  model <- lm(y~x)$coef[1] + lm(y~x)$coef[2]*content
  # variance of the residuals
  res <- lm(y~x)$res
  res.var <- sum((res-mean(res))^2)/(length(x)-2)
  pred <- qt(1-alpha/2, length(x)-2) * res.var^0.5*
  (1/m+ 1/length(x) + (content-mean(x))^2/sum( (x-mean(x))^2 ) )^0.5
  data.frame( list(
    content = content , y.model = model,
    pred.up = model + pred, pred.low = model - pred
  ) )
}
```

```
#####  
# for reverse regression  
# return the reverse value of a new mesure new.mes with its uncertainties  
# return a warning message if the calibration is useless  
# g.limit > 0.2 by default (broad prediction interval)  
rev.calib <- function(new.mes,alpha, x, y, m=1, g.limit=0.2){  
  #linear model  
  lm.out <- lm( y ~ x )  
  summary.lm.out <- summary(lm.out)  
  # slope  
  b1 <- summary.lm.out$coef[2]  
  #y-intercept  
  b0 <- summary.lm.out$coef[1]  
  student.coef <- qt(1-alpha/2, length(x)-2)  
  sxx <- sum ( (x- mean(x))^2 )  
  res.var <- summary.lm.out$sigma^2  
  g <- (student.coef*res.var^0.5/b1)^2/sxx  
  # diagnostic if calibration is useless print the the upper limit for g = 0.02  
  if (g>0.2)  
    cat(paste("g>", g,"\n"))  
  xchap <- (new.mes-b0)/b1  
  num <- student.coef*res.var^.5/b1 *  
    ((xchap-mean(x))^2/sxx + (1/m+1/length(x))*(1-g))^0.5  
  xu <- mean(x) + ( xchap-mean(x) + num)/(1-g)  
  xlow <- mean(x) + ( xchap-mean(x) - num)/(1-g)  
  
  data.frame(list(content = xchap , xu = xu, xlow = xlow))  
}  
  
#####  
# detection limit : critical limit lc  
# return the critical limit lc and reverse regression to  
# return its corresponding value in x axis.  
limit <- function(x, y, alpha){  
  #linear model  
  lm.out <- lm( y ~ x )  
  summary.lm.out <- summary(lm.out)  
  # slope  
  b1 <- summary.lm.out$coef[2]  
  #y-intercept  
  b0 <- summary.lm.out$coef[1]  
  student.coef <- qt(1-alpha/2, length(x)-2)  
  sxx <- sum ( (x- mean(x))^2 )  
  res.var <- summary.lm.out$sigma^2  
  # critical limit  
  lc <- interv(x, y, 0.05, 0, 1)$pred.up  
  # xc  
  xc <- rev.calib(lc, alpha, x, y, m=1)$content  
  data.frame(  
    list(xc=xc, lc = lc)  
  )  
}
```

## 2 Reverse calibration script for an R session

This section gives an example of reverse calibration to find the [N] content or the N/C ratio. The figure 1 shows the calibration of [N]  $\text{mg.g}^{-1}$  with  $\text{CN}^-/\text{C}^-$  and N/C with  $\text{CN}^-/\text{C}_2^-$ . The linear model, prediction interval and reversion of a new measurement, arbitrarily chosen for each calibration, is also displayed.

```
# the data file with a .txt extension is stored in a directory "yourdirectory" in
```

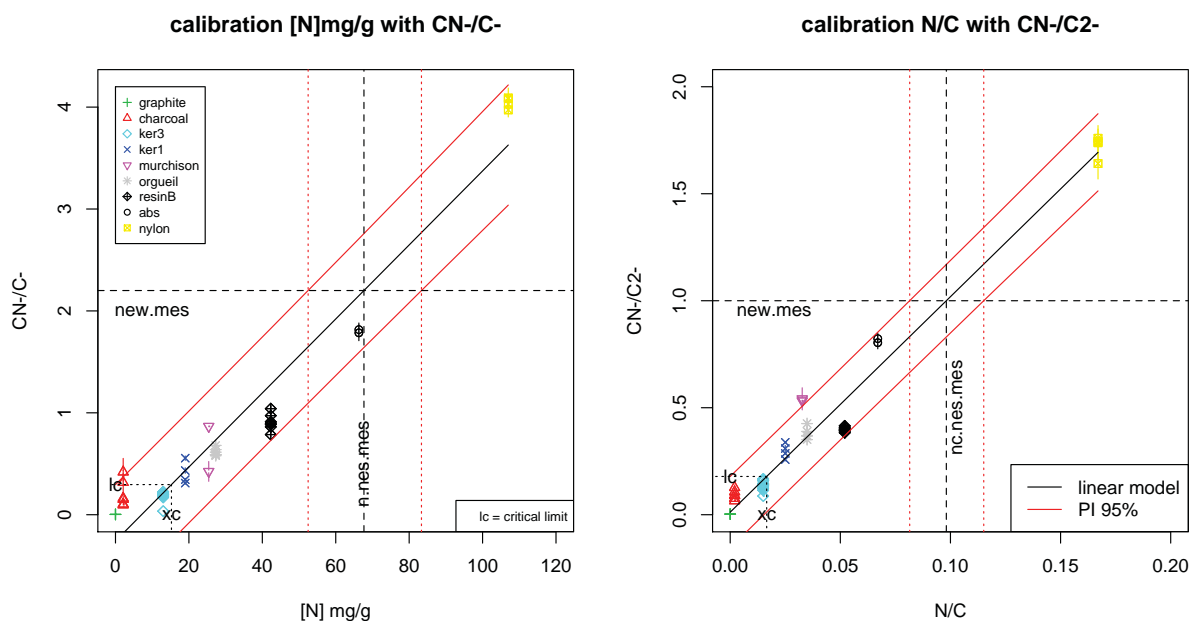

Figure 1: Calibration plot of the  $[N]/\text{mg}\cdot\text{g}^{-1}$  with  $\text{CN}^-/\text{C}^-$  and  $\text{N}/\text{C}$  atomic ratio with  $\text{CN}^-/\text{C}_2^-$ . The new.mes is inverted in **n.new.mes** and **nc.new.mes** with their uncertainties. **lc** is the critical limit and **xc** its reverse value.

```
# your Desktop for instance (for Unix-like system) :
setwd("~/Desktop/yourdirectory")

# load package
library("gplots")

# load data from the data file "nitrogen_calib.txt". The data shown at the table 1 should be store inside the
d <- read.table("nitrogen_calib.txt")

# plot calibration data

layout(matrix(1:2,1,2))

plotCI( d$n_mgg, d$meancnc, uiw = 2*d$sd_cnc, sfrac=0, gap = 0.1,
        col = d$type, cex = .9, pch = as.numeric(d$type),
        xlim = c(0,120), ylim = c(0,4.2), xlab = "[N]mg/g", ylab = "CN-/C-",
        main="calibration [N]mg/g with CN-/C-")

legend(0,4.2, unique(d$type), col = unique(d$type), pch = unique(as.numeric(d$type)), cex=.7 )

# prediction band CN/C- vs. [N] mg/g
calib.model.cnc <- interv(d$n_mgg, d$meancnc, 0.05)
matlines(calib.model.cnc[,1], calib.model.cnc[,-1], , col=c(1, 2,2), lty=1)

#####
# reverse calibration for new.mes.cnc of CN-/C- measured in a sample
```

```
new.mes.cnc <- 2.2

# on the plot CN-/C- vs. [N] mg/g
abline( h = new.mes.cnc, lty = 2)
text(10,new.mes.cnc-.2, "new.mes")
# reverse calibration and prediction interval to obtain the N/C and
# its uncertainties corresponding to new.mes.cnc2
# function rev.calib() do the work
n.nes.mes <- rev.calib(new.mes.cnc, 0.05, d$n_mgg, d$meancnc, 1)

abline( v = n.nes.mes, col=c(1,2,2), lty = c(2,3,3) )
text(n.nes.mes$content, 0.5, "n.nes.mes", srt=90)
#####
# detection limit for CN-/C-

l.cnc <- limit(d$n_mgg, d$meancnc, 0.05)

segments(l.cnc$xc, -1, l.cnc$xc, l.cnc$lc, lty=3)
text( l.cnc$xc, 0, "xc")

segments(-1, l.cnc$lc, l.cnc$xc, l.cnc$lc, lty=3)
text( 0, l.cnc$lc, "lc")

legend( "bottomright", "lc= critical limit", cex=.7 )

#####

plotCI( d$nc, d$meancnc2, uiw = 2*d$sd_cnc2, sfrac=0, gap = 0.1,
        col = d$type, cex = .9, pch = as.numeric(d$type),
        xlim = c(0,.2), ylim = c(0,2), xlab = "N/C", ylab = "CN-/C2-",
        main="calibration [N]mg/g with CN-/C2-")

# prediction band CN-/C2- vs N/C atomic ratio
calib.model.cnc2 <- interv(d$nc, d$meancnc2, 0.05)
matlines(calib.model.cnc2[,1], calib.model.cnc2[,-1], col=c(1, 2,2), lty=1)

# legend for the calibration model and prediction interval PI
legend("bottomright",c("linear model", "PI_95%"), col=c(1, 2), lty=1)

#####
# reverse calibration for new.mes.cnc2 of CN-/C2- measured in a sample
new.mes.cnc2 <- 1

# on the plot CN-/C2- vs. N/C
abline( h = new.mes.cnc2, lty = 2)

# reverse calibration and prediction interval to obtain the N/C and
# its uncertainties corresponding to new.mes.cnc2
# function rev.calib() do the work
nc.nes.mes <- rev.calib(new.mes.cnc2, 0.05, d$nc, d$meancnc2, 1)

abline( v = nc.nes.mes, col=c(1,2,2), , lty = c(2,3,3) )

#####
# detection limit for CN-/C2-

l.cnc2 <- limit(d$nc, d$meancnc2, 0.05)

segments(l.cnc2$xc, -1, l.cnc2$xc, l.cnc2$lc, lty=3)
text( l.cnc2$xc, 0, "xc")

segments(-1, l.cnc2$lc, l.cnc2$xc, l.cnc2$lc, lty=3)
text( 0, l.cnc2$lc, "lc")
```

## References

- [1] R Core Team R: A Language and Environment for Statistical Computing, R Foundation for Statistical Computing, Vienna, Austria, 2013, <http://www.R-project.org>
- [2] Draper, N.R., Smith, H. Applied regression analysis, Third edition, Wiley Series in probability and statistics, 1998
- [3] Lavagnini, I., Magno, F. A statistical overview on univariate calibration, inverse regression, and detection limits : application to gas chromatography/mass spectrometry technique, Mass Spectrometry Review, 26, 1-18, 2007

| session | type           | N/C   | [N]/m $\mu$ g | $^{12}\text{C}^{14}\text{N}^-/^{12}\text{C}^-$ | $^{12}\text{C}^{14}\text{N}^-/^{12}\text{C}^-$ |
|---------|----------------|-------|---------------|------------------------------------------------|------------------------------------------------|
| january | graphite       | 0.000 | 0.000         | 0.003 $\pm$ 0.000                              | 0.003 $\pm$ 0.000                              |
| january | graphite       | 0.000 | 0.000         | 0.003 $\pm$ 0.000                              | 0.003 $\pm$ 0.000                              |
| july    | charcoal       | 0.002 | 2.100         | 0.104 $\pm$ 0.002                              | 0.065 $\pm$ 0.001                              |
| july    | charcoal       | 0.002 | 2.100         | 0.162 $\pm$ 0.010                              | 0.090 $\pm$ 0.003                              |
| july    | charcoal       | 0.002 | 2.100         | 0.150 $\pm$ 0.008                              | 0.090 $\pm$ 0.003                              |
| july    | charcoal       | 0.002 | 2.100         | 0.096 $\pm$ 0.006                              | 0.076 $\pm$ 0.003                              |
| july    | charcoal       | 0.002 | 2.100         | 0.419 $\pm$ 0.067                              | 0.127 $\pm$ 0.006                              |
| july    | charcoal       | 0.002 | 2.100         | 0.316 $\pm$ 0.060                              | 0.107 $\pm$ 0.008                              |
| july    | type 3 kerogen | 0.015 | 13.000        | 0.194 $\pm$ 0.000                              | 0.162 $\pm$ 0.001                              |
| july    | type 3 kerogen | 0.015 | 13.000        | 0.178 $\pm$ 0.001                              | 0.160 $\pm$ 0.001                              |
| july    | type 3 kerogen | 0.015 | 13.000        | 0.222 $\pm$ 0.001                              | 0.159 $\pm$ 0.001                              |
| july    | type 3 kerogen | 0.015 | 13.000        | 0.200 $\pm$ 0.008                              | 0.167 $\pm$ 0.005                              |
| january | type 3 kerogen | 0.015 | 13.000        | 0.212 $\pm$ 0.001                              | 0.114 $\pm$ 0.000                              |
| january | type 3 kerogen | 0.015 | 13.000        | 0.209 $\pm$ 0.001                              | 0.143 $\pm$ 0.001                              |
| january | type 3 kerogen | 0.015 | 13.000        | 0.192 $\pm$ 0.004                              | 0.132 $\pm$ 0.001                              |
| january | type 3 kerogen | 0.015 | 13.000        | 0.224 $\pm$ 0.001                              | 0.135 $\pm$ 0.000                              |
| january | type 3 kerogen | 0.015 | 13.000        | 0.169 $\pm$ 0.001                              | 0.124 $\pm$ 0.001                              |
| january | type 3 kerogen | 0.015 | 13.000        | 0.182 $\pm$ 0.004                              | 0.121 $\pm$ 0.001                              |
| january | type 3 kerogen | 0.015 | 13.000        | 0.187 $\pm$ 0.001                              | 0.141 $\pm$ 0.000                              |
| january | type 3 kerogen | 0.015 | 13.000        | 0.035 $\pm$ 0.002                              | 0.087 $\pm$ 0.001                              |
| january | type 3 kerogen | 0.015 | 13.000        | 0.223 $\pm$ 0.001                              | 0.143 $\pm$ 0.000                              |
| january | type 3 kerogen | 0.015 | 13.000        | 0.198 $\pm$ 0.000                              | 0.146 $\pm$ 0.000                              |
| january | type 3 kerogen | 0.015 | 13.000        | 0.180 $\pm$ 0.000                              | 0.138 $\pm$ 0.002                              |
| july    | type 1 kerogen | 0.025 | 19.000        | 0.344 $\pm$ 0.006                              | 0.287 $\pm$ 0.002                              |
| july    | type 1 kerogen | 0.025 | 19.000        | 0.555 $\pm$ 0.011                              | 0.338 $\pm$ 0.001                              |
| july    | type 1 kerogen | 0.025 | 19.000        | 0.434 $\pm$ 0.013                              | 0.309 $\pm$ 0.007                              |
| july    | type 1 kerogen | 0.025 | 19.000        | 0.310 $\pm$ 0.005                              | 0.258 $\pm$ 0.003                              |
| july    | Murchison IOM  | 0.033 | 25.400        | 0.425 $\pm$ 0.049                              | 0.542 $\pm$ 0.026                              |
| january | Murchison IOM  | 0.033 | 25.400        | 0.867 $\pm$ 0.001                              | 0.532 $\pm$ 0.001                              |
| january | Orgueil IOM    | 0.035 | 27.300        | 0.680 $\pm$ 0.001                              | 0.368 $\pm$ 0.000                              |
| january | Orgueil IOM    | 0.035 | 27.300        | 0.590 $\pm$ 0.001                              | 0.370 $\pm$ 0.001                              |
| january | Orgueil IOM    | 0.035 | 27.300        | 0.590 $\pm$ 0.001                              | 0.351 $\pm$ 0.001                              |
| january | Orgueil IOM    | 0.035 | 27.300        | 0.579 $\pm$ 0.001                              | 0.369 $\pm$ 0.000                              |
| january | Orgueil IOM    | 0.035 | 27.300        | 0.614 $\pm$ 0.001                              | 0.389 $\pm$ 0.001                              |
| january | Orgueil IOM    | 0.035 | 27.300        | 0.639 $\pm$ 0.006                              | 0.426 $\pm$ 0.003                              |
| january | Resin B        | 0.052 | 42.300        | 0.885 $\pm$ 0.008                              | 0.383 $\pm$ 0.003                              |
| january | Resin B        | 0.052 | 42.300        | 0.862 $\pm$ 0.004                              | 0.391 $\pm$ 0.004                              |
| january | Resin B        | 0.052 | 42.300        | 0.972 $\pm$ 0.009                              | 0.401 $\pm$ 0.004                              |
| january | Resin B        | 0.052 | 42.300        | 0.899 $\pm$ 0.004                              | 0.409 $\pm$ 0.006                              |
| january | Resin B        | 0.052 | 42.300        | 0.913 $\pm$ 0.014                              | 0.415 $\pm$ 0.008                              |
| january | Resin B        | 0.052 | 42.300        | 1.041 $\pm$ 0.014                              | 0.398 $\pm$ 0.003                              |
| january | Resin B        | 0.052 | 42.300        | 0.787 $\pm$ 0.009                              | 0.393 $\pm$ 0.005                              |
| july    | ABS            | 0.067 | 66.300        | 1.816 $\pm$ 0.032                              | 0.823 $\pm$ 0.013                              |
| july    | ABS            | 0.067 | 66.300        | 1.785 $\pm$ 0.038                              | 0.804 $\pm$ 0.014                              |
| july    | nylon          | 0.167 | 107.000       | 4.083 $\pm$ 0.017                              | 1.738 $\pm$ 0.040                              |
| july    | nylon          | 0.167 | 107.000       | 3.973 $\pm$ 0.034                              | 1.641 $\pm$ 0.036                              |
| july    | nylon          | 0.167 | 107.000       | 4.030 $\pm$ 0.023                              | 1.759 $\pm$ 0.021                              |
| july    | nylon          | 0.167 | 107.000       | 4.090 $\pm$ 0.048                              | 1.744 $\pm$ 0.014                              |

Table 1:  $^{12}\text{C}^{14}\text{N}^-/^{12}\text{C}^-$  and  $^{12}\text{C}^{14}\text{N}^-/^{12}\text{C}^-$  measurements of the standards. One row of the table is a single measurement or image.
